# Supplementary material for: Study of the forced degradation of isoconazole nitrate in bulk drug and cream formulations
Source: Royal Society of Chemistry journal article supplement (doi:10.1039/c2ay05580e), 2012-01-01
Supplement: c2ay05580e_2.pdf [file c2ay05580e_2.pdf]

**Table S1.** Analytical data for the calibration curve of IN assay.

| <b>Range (%)</b> | <b>Concentration (<math>\mu\text{g mL}^{-1}</math>)</b> | <b>Mean of the areas (a.u.)</b> | <b>RSD (%)</b> |
|------------------|---------------------------------------------------------|---------------------------------|----------------|
| 50               | 25                                                      | 502856                          | 0.51           |
| 60               | 30                                                      | 603460                          | 1.11           |
| 70               | 35                                                      | 696487                          | 0.10           |
| 80               | 40                                                      | 810419                          | 0.47           |
| 90               | 45                                                      | 899034                          | 0.39           |
| 100              | 50                                                      | 993659                          | 0.71           |
| 110              | 55                                                      | 1098174                         | 0.09           |
| 120              | 60                                                      | 1204940                         | 0.33           |
| 130              | 65                                                      | 1317975                         | 1.74           |
| 150              | 75                                                      | 1494289                         | 0.52           |
