# Supplementary material for: Study of the forced degradation of isoconazole nitrate in bulk drug and cream formulations
Source: Royal Society of Chemistry journal article supplement (doi:10.1039/c2ay05580e), 2012-01-01
Supplement: c2ay05580e_3.pdf [file c2ay05580e_3.pdf]

**Table S2.** IN determination in cream formulation by HPLC-DAD.

| <b>IN sample</b> | <b>Concentration taken (<math>\mu\text{g mL}^{-1}</math>)</b> | <b>Mean of the areas (a.u.)</b> | <b>Recovery (%)</b> |
|------------------|---------------------------------------------------------------|---------------------------------|---------------------|
| 1                | 52.70                                                         | 1153507                         | 101.51              |
| 2                | 49.50                                                         | 1084881                         | 100.03              |
| 3                | 49.60                                                         | 1087570                         | 100.25              |
| 4                | 51.00                                                         | 1116148                         | 100.63              |
| 5                | 51.00                                                         | 1117981                         | 101.57              |
| 6                | 52.30                                                         | 1144885                         | 101.52              |
| Mean             | 51.00                                                         | 1117495                         | 100.92              |
| SD               | 0.64                                                          |                                 |                     |
| RSD (%)          | 0.63                                                          |                                 |                     |
