# Supplementary material for: Study of the forced degradation of isoconazole nitrate in bulk drug and cream formulations
Source: Royal Society of Chemistry journal article supplement (doi:10.1039/c2ay05580e), 2012-01-01
Supplement: c2ay05580e_4.pdf [file c2ay05580e_4.pdf]

**Table S3.** Analytical data for accuracy determination in IN assay.

| <b>Level (%)</b> | <b>Concentration taken (<math>\mu\text{g mL}^{-1}</math>)</b> | <b>Mean peak areas (a.u.)</b> | <b>Recovery (%)</b> |
|------------------|---------------------------------------------------------------|-------------------------------|---------------------|
| 80               | 40.80                                                         | 906951                        | 98.03               |
| 80               | 40.80                                                         | 962348                        | 103.76              |
| 80               | 40.80                                                         | 938609                        | 101.23              |
| 100              | 51.00                                                         | 1188174                       | 101.68              |
| 100              | 51.00                                                         | 1218531                       | 104.19              |
| 100              | 51.00                                                         | 1201022                       | 102.74              |
| 120              | 61.20                                                         | 1421353                       | 100.80              |
| 120              | 61.20                                                         | 1467640                       | 103.99              |
| 120              | 61.20                                                         | 1443445                       | 102.32              |
|                  |                                                               | Mean                          | 102.08              |
|                  |                                                               | SD                            | 1.95                |
|                  |                                                               | SDR (%)                       | 1.91                |
